# Supplementary material
Source: publisher figshare collection journal article supplement (https://karger.figshare.com/ndownloader/files/33157151)
Supplement: Supplementary file 1 [file 33157151]

**Table S4 Primer sequence in the RT-PCR**

| **Primer name** | **Primer sequence (5’ to 3’)** |
| --- | --- |
| GAPDH-F (internal reference) | 5-CTGGGCTACACTGAGCACC-3 |
| GAPDH-R (internal reference) | 5-AAGTGGTCGTTGAGGGCAATG-3 |
| ACTB-F (internal reference) | 5-GATCAAGATCATTGCTCCTCCT-3 |
| ACTB-R (internal reference) | 5-TACTCCTGCTTGCTGATCCA-3 |
| TGFBR3-F | 5-GTGTTCCCTCCAAAGTGCAAC-3 |
| TGFBR3-R | 5-AGCTCGATGATGTGTACTTCCT-3 |
| CTNNA3-F | 5-CTTGAGGAAGTTCGCAAAGAAAG-3 |
| CTNNA3-R | 5-GCAAGAGGCACATGACATCAAT-3 |
| SOST-F | 5-AATCACATCCGCCCCAACTT-3 |
| SOST-R | 5-AAGGGATGTGCTGGTCTGTG-3 |
| AGTR1-F | 5-TTCCTCTGCAGCACTTCACT-3 |
| AGTR1-R | 5-TTGTTCTTCGAGCAGCCGT-3 |
| MFAP4-F | 5-GCCTTTGTGGTCCATCTTGT-3 |
| MFAP4-R | 5-GCTGAAGATGGGACATGGTT-3 |
| MYOCD-F | 5-CCACCTATGGACTCAGCCTAC-3 |
| MYOCD-R | 5-CTCAGTGGCGTTGAAGAAGAG-3 |
| TOX-F | 5-GTGATGCCAGATATACGAAACCC-3 |
| TOX-R | 5-AGCTGTGACTGGTTAATGGTAGT-3 |
| ADIPOQ-F | 5-TAGCTCTGCCCGGTCATGA-3 |
| ADIPOQ-R | 5-TGCCATCTCTGCCATCACG-3 |
| CD34-F | 5-AATCAGCACAGTGTTCACCAC-3 |
| CD34-R | 5-TGCCCTGAGTCAATTTCACTTC-3 |
| hsa-miR-4701-3p | 5-ATGGGTGATGGGTGTGGTGT-3 |
| hsa-miR-3907 | 5-AGGTGCTCCAGGCTGGCTCACA-3 |
